# Supplementary material for: Synthesis of continuous MoS2:Er films and their enhanced NIR photoresponse for photo communication
Source: Royal Society of Chemistry journal article supplement (doi:10.1039/d3tc01583a), 2023-01-01
Supplement: d3tc01583a1.pdf [file d3tc01583a1.pdf]

## Supporting Information

*Synthesis of continuous MoS<sub>2</sub>:Er films and their enhanced NIR  
photoresponse for photo communication*

*Lei Wang,<sup>a, b</sup> Xiaohong Ji,<sup>a\*</sup> and Qinyuan Zhang<sup>a, b\*</sup>*

*<sup>a</sup>School of Materials Science and Engineering, South China University of Technology, 510641, China.*

*<sup>b</sup>State Key Laboratory of Luminescent Material and Devices, South China University of Technology, 510641, China.*

*\*E-mail: jxhong@scut.edu.cn; qyzhang@scut.edu.cn.*

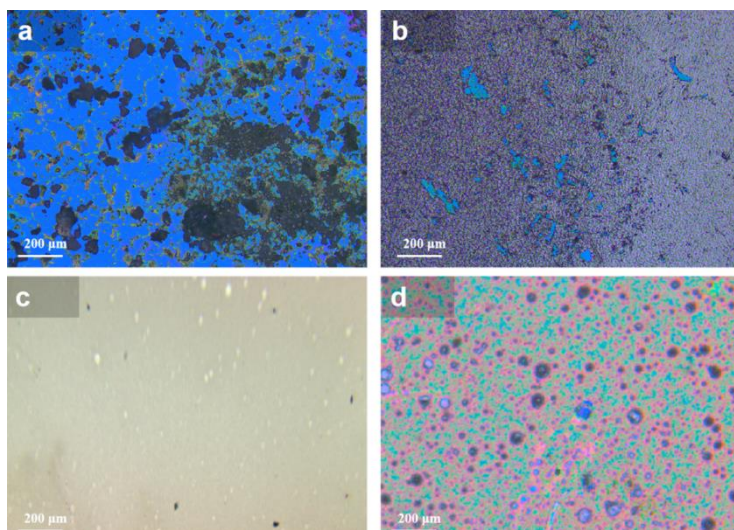

**Figure S1** Influence of the amount of  $C_6H_8O_7$  on the morphology of the film. Optical images of  $MoS_2:Er$  films with adding a) 300 mg, b) 500 mg, c) 700 mg, and d) 900 mg  $C_6H_8O_7$  into the precursor solutions, respectively. Too little dosage would lead to the insufficient viscosity of the precursor solution and the incomplete dissolution of the precipitate  $Er_2MoO_6$ , while too much dosage would lead to more holes in the film due to the large amount of gas produced by the decomposition of  $C_6H_8O_7$ .

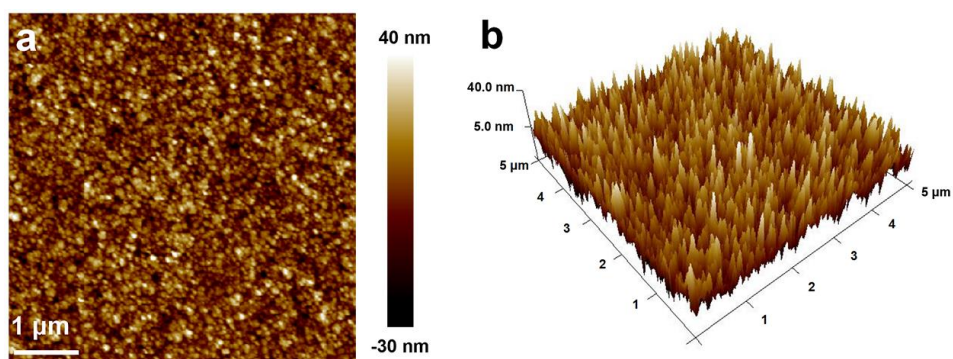

**Figure S2** (a) 2D and (b) 3D AFM image of the MoS<sub>2</sub>:2mol%Er film.

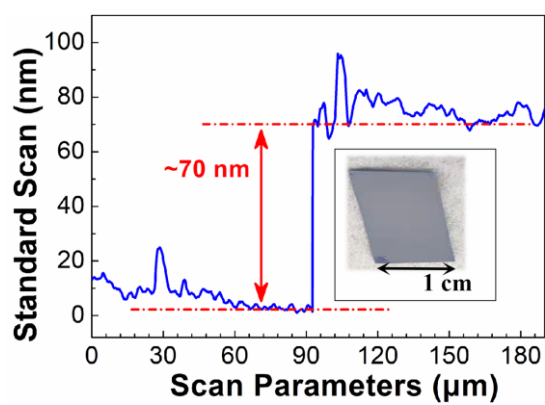

**Figure S3** Height curve of the MoS<sub>2</sub>:2mol%Er film.

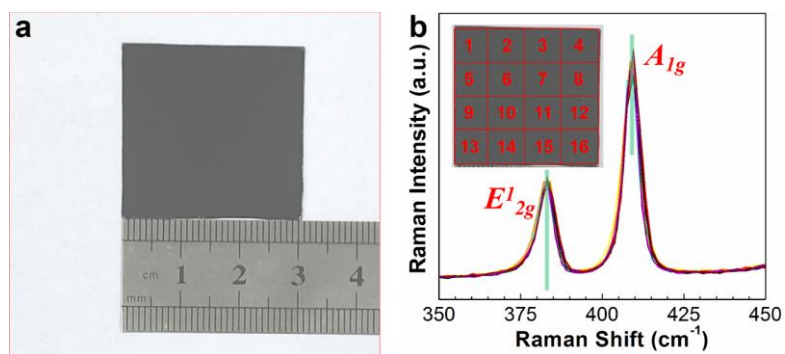

**Figure S4** (a) Digital photo of the MoS<sub>2</sub>:2mol%Er film on a 3×3 cm<sup>2</sup> 300-nm-SiO<sub>2</sub>/Si substrate. (b) Raman spectra of different regions on the substrate. The inset in (b) presents the different regions on the substrate. The Raman spectra exhibit generally consistent peak positions and intensities.

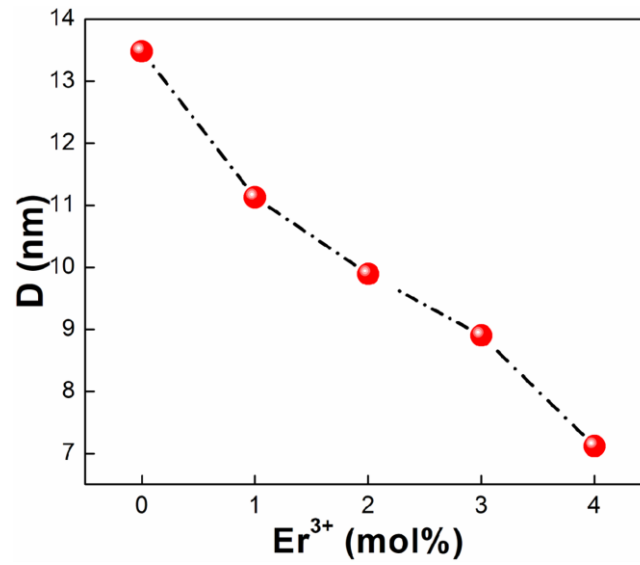

**Figure S5** Average grain size dependence of Er<sup>3+</sup> doping concentration. The average grain size ( $D$ ) was obtained from the XRD patterns in terms of diffraction of (002) planes and the Scherrer Formula:  $D=K\lambda/(\beta\cos\gamma)$ , where  $K$  is the Scherrer constant,  $\lambda$  is the X-ray wavelength,  $\beta$  is the line broadening at FWHM in radians, and  $\gamma$  is the Bragg's angle in degrees.<sup>[2]</sup> The decrease in particle size would lead to an enhanced lattice scattering for the carrier.<sup>[3]</sup>

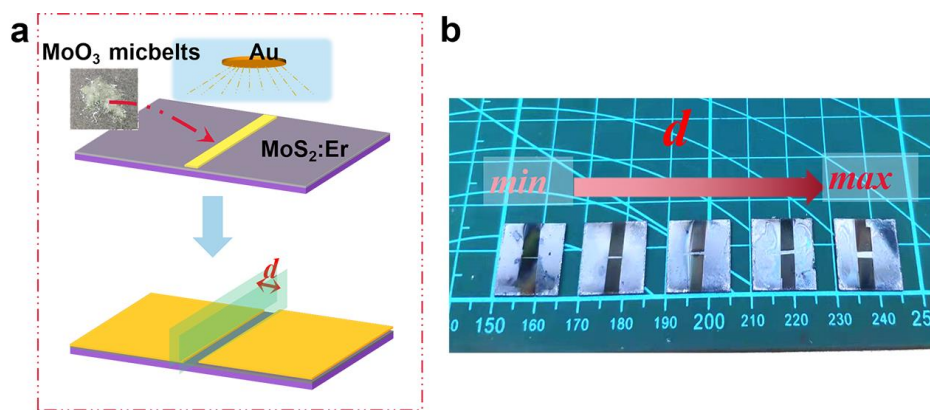

**Figure S6** a) Schematic diagram showing the synthesis process of devices with different electrode distances. The self-synthesized MoO<sub>3</sub> micribelt was used as the mask, so the electrode distance of the photodetector device can be flexibly controlled. b) The camera photos of obtained devices with different electrode distances.

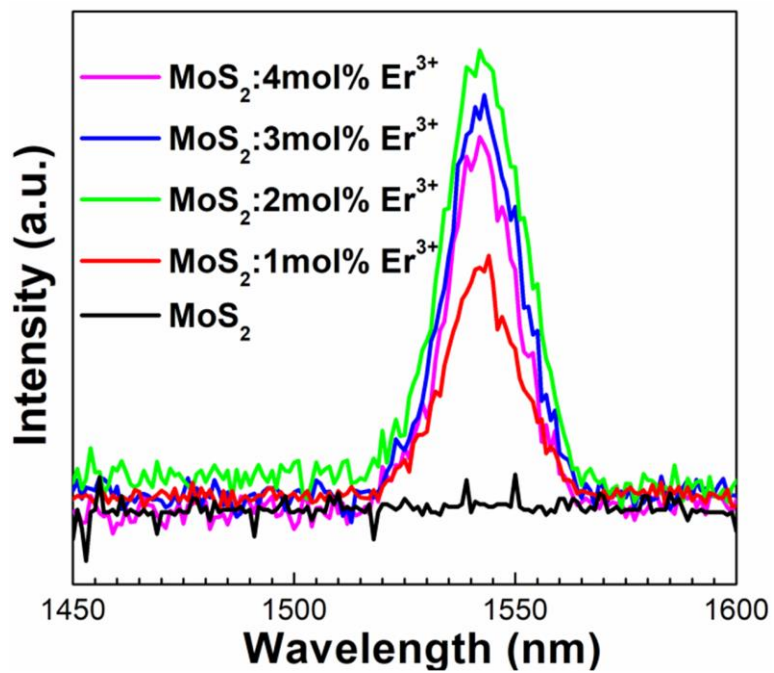

**Figure S7** The emission intensity variation in  ${}^4I_{13/2} \rightarrow {}^4I_{15/2}$  energy transition of  $\text{Er}^{3+}$  ions at different doping concentrations. The photoluminescence spectra were excited by a 980 nm laser.

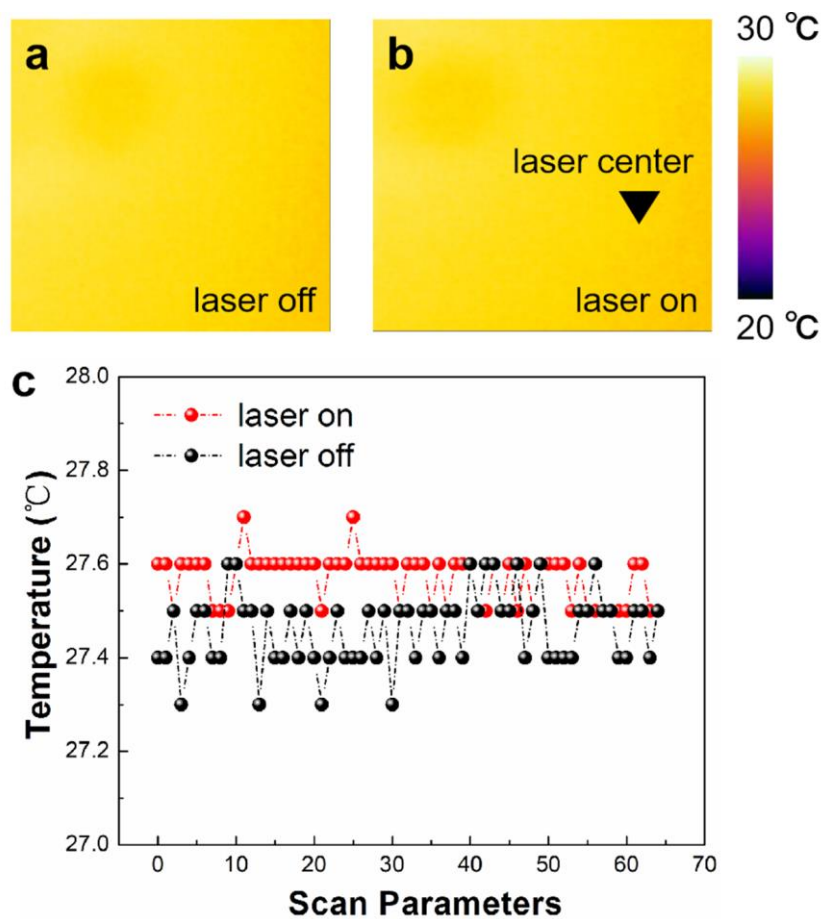

**Figure S8** 2D infrared images of MoS<sub>2</sub>:2mol%Er film in the a) “off” and b) “on” states (980 nm@20 mW/cm<sup>2</sup>). c) Temperature distribution curves of MoS<sub>2</sub>:2mol%Er film in the “off” and “on” states.



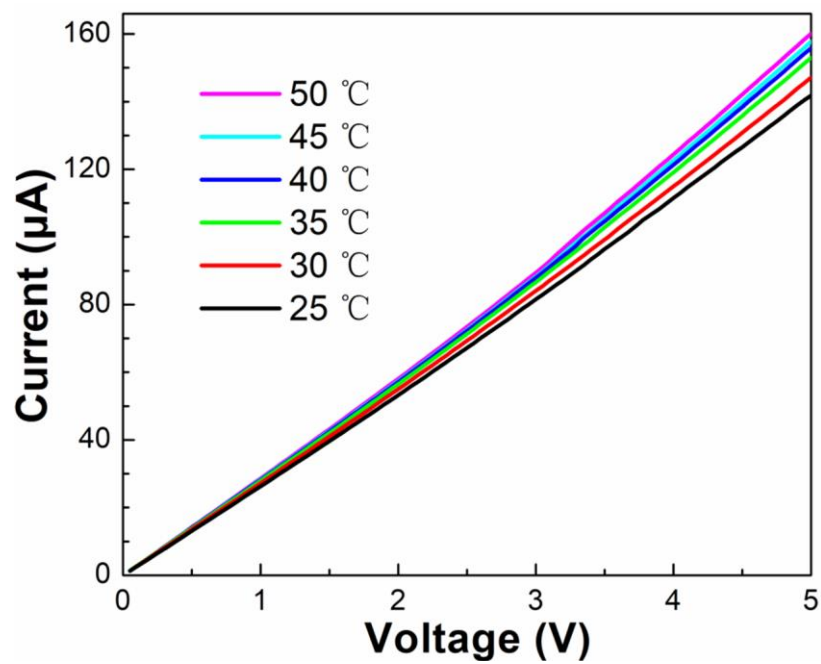

**Figure S9** Temperature-dependent  $I$ - $V$  curves of the device. The temperature has a slight effect on the resistance. Thus, the enhanced photoelectric performance is not related to the NIR thermal effect.

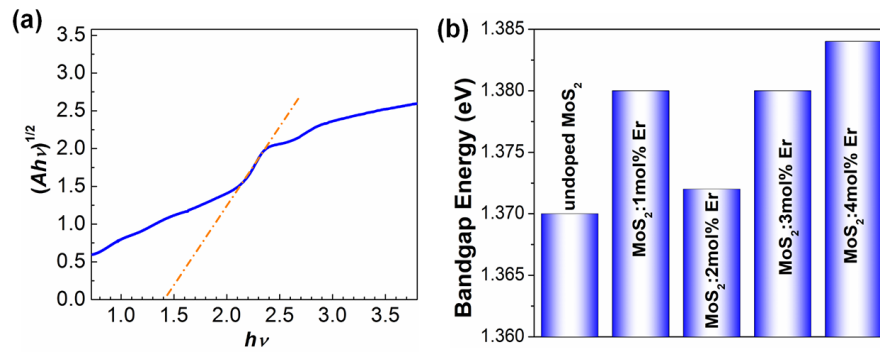

**Figure S10** (a) Replot of absorption spectra of MoS<sub>2</sub>:Er films. (b) Change in the bandgap as a function of doping concentration.

The bandgap energy ( $E_g$ ) can be deduced from the absorption spectra according to the formula

$$[F(R'_\infty)*h\nu]^{1/2} = B(h\nu - E_g)$$

where  $R'_\infty$  is the absolute reflectance of the sample at an infinite thickness,  $h$  is Planck's constant,  $\nu$  is the photon frequency, and  $B$  is the proportionality constant.<sup>[4]</sup> The bandgap energy value of the MoS<sub>2</sub>:Er films is ~1.38 eV. The negligible difference in  $E_g$  for various concentrations of Er-doped MoS<sub>2</sub> films demonstrates the weak effect of Er<sup>3+</sup> doping on the bandgap width of the host.

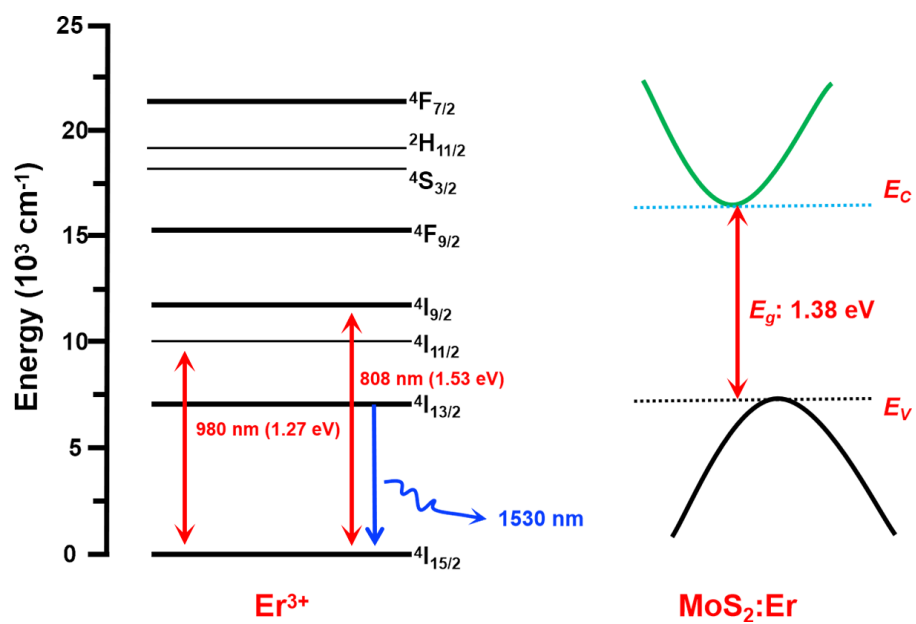

Figure S11 Energy levels of  $\text{Er}^{3+}$  ions and band structure of the bulk  $\text{MoS}_2:\text{Er}$ .<sup>[5]</sup>

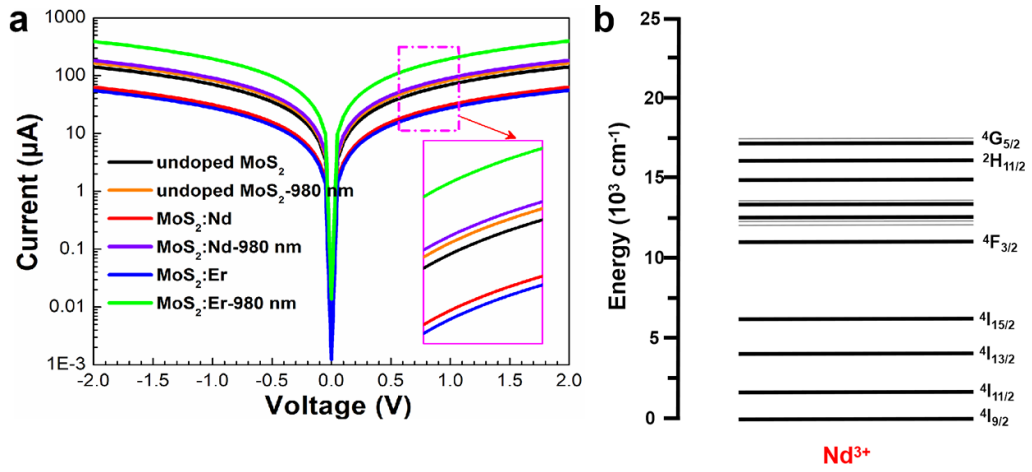

**Figure S12** a)  $I$ - $V$  curves of the undoped MoS<sub>2</sub>, MoS<sub>2</sub>:2mol%Nd and MoS<sub>2</sub>:2mol%Er. b)

Energy levels of Nd<sup>3+</sup> ions.<sup>[6]</sup> The gain of the photoconductance can be obtained by doping

Nd<sup>3+</sup> ions ( $R_{dark}/R_{light}$  ratio: 2.91), which is lower than doping Er<sup>3+</sup> ions.

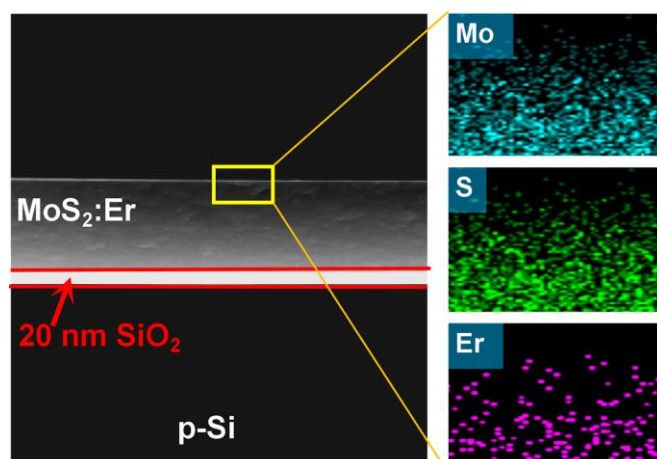

**Figure S13** Cross-section SEM image of the MoS<sub>2</sub>:Er/SiO<sub>2</sub>/p-Si heterojunction and EDS elemental mapping images of Mo, S, and Er. The selected area was marked by a yellow box in the SEM image.

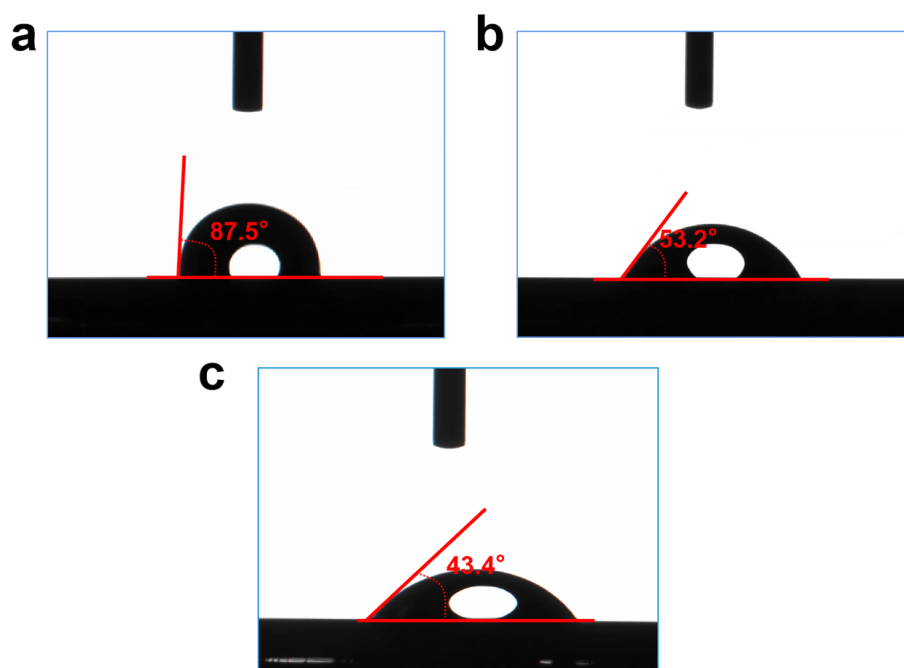

**Figure S14** Hydrophilic test results of a) untreated Si substrate, b) Si substrate treated by NaOH ethanol solution, and c) 20-nm-SiO<sub>2</sub>/Si substrate. Water contact angles were measured to be 87.5°, 53.2°, and 43.4°, respectively.

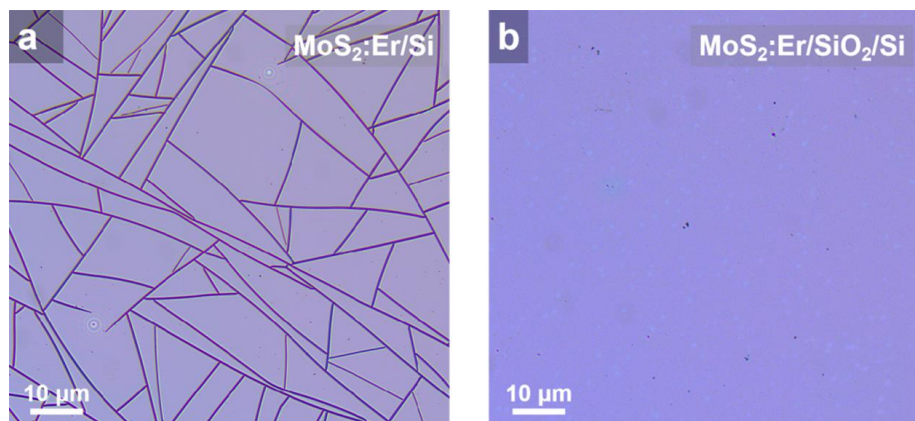

**Figure S15** Optical images of MoS<sub>2</sub>:Er films on the a) treated Si substrate and b) 20-nm-SiO<sub>2</sub>/Si substrate.

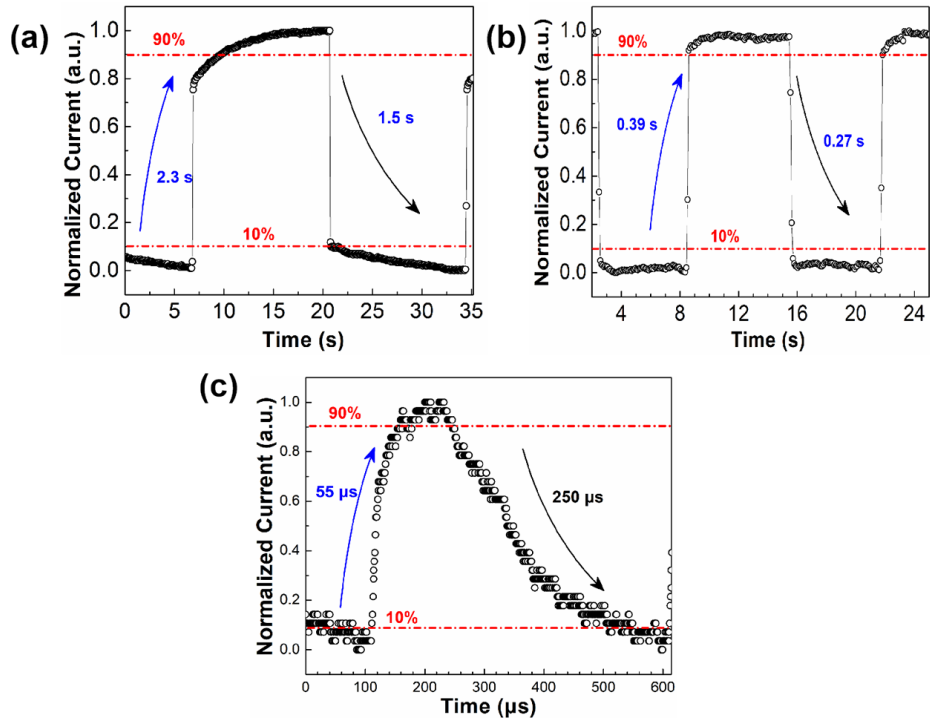

**Figure S16** Typical rise and fall processes of MoS<sub>2</sub>:Er-based device a) without SiO<sub>2</sub> layer, b) with 5-nm SiO<sub>2</sub> layer and c) with 30-nm SiO<sub>2</sub> layer.



**Table S1** The key performance parameters of the MoS<sub>2</sub>-based NIR photodetectors. Here,  $\lambda$  (nm),  $R$  (mA W<sup>-1</sup>),  $D^*$  (Jones) and  $t_r/t_f$ , are the light wavelength, the responsivity, the detectivity, and the rise/fall time, respectively.

| Structure                                                                | Voltage<br>(V) | $\lambda$<br>(nm) | $R^*$              | $D^*$                                   | $t_r/t_f$                                        | Ref.                 |
|--------------------------------------------------------------------------|----------------|-------------------|--------------------|-----------------------------------------|--------------------------------------------------|----------------------|
| MoS <sub>2</sub> /p-Si                                                   | -2             | 808               | 746                | $6 \times 10^{11}$                      | 178 $\mu$ s/198 $\mu$ s                          | <b>7</b>             |
| MoS <sub>2</sub> /PbS                                                    | 1              | 850               | $5.4 \times 10^7$  | $10^{11}$                               | 950 $\mu$ s/1ms                                  | <b>8</b>             |
| MoS <sub>2</sub> /p-Si                                                   | 6              | 850               | 10                 | $4.53 \times 10^{10}$                   | 78 $\mu$ s/76 $\mu$ s                            | <b>9</b>             |
| Au@MoS <sub>2</sub> /p-Si                                                | 4              | 800               | $3 \times 10^4$    | -                                       | 20ms/20ms                                        | <b>10</b>            |
| MoS <sub>2</sub> /p-Si                                                   | -9             | 850               | $1.78 \times 10^7$ | $10^{13}$                               | 1.44ms/1.45ms                                    | <b>11</b>            |
| MoS <sub>2</sub> /PbS@Au                                                 | 4.5            | 1064              | $1.22 \times 10^3$ | $1.56 \times 10^9$                      | >1s/>1s                                          | <b>12</b>            |
| MoS <sub>2</sub> / $\alpha$ -MoTe <sub>2</sub>                           | -              | 800               | 38                 | -                                       | 25ms/-                                           | <b>13</b>            |
| 2D Te/MoS <sub>2</sub>                                                   | 8              | 980               | $2.84 \times 10^4$ | $2.7 \times 10^{10}$                    | -                                                | <b>14</b>            |
| PbSe/MoS <sub>2</sub>                                                    | 3              | 808               | $1.97 \times 10^4$ | $2.65 \times 10^{10}$                   | 0.38s/0.86s                                      | <b>15</b>            |
| MoS <sub>2</sub> /p-Si                                                   | -4             | 850               | -                  | -                                       | 2ms/5ms                                          | <b>16</b>            |
| MoS <sub>2</sub> /Al <sub>2</sub> O <sub>3</sub> /p-GaAs                 | -0.1           | 1064              | 143.2              | $3.32 \times 10^{10}$                   | 12 $\mu$ s/32 $\mu$ s                            | <b>17</b>            |
| MoS <sub>2</sub> @CsPbBr <sub>3</sub><br>QDs/Si                          | -3             | 808               | 975                | $6.56 \times 10^{11}$                   | 6.8ms/6.7ms                                      | <b>18</b>            |
| MoS <sub>2</sub> /SnS                                                    | 1              | 808               | 2.44               | $5.94 \times 10^7$                      | 0.69s/0.65s                                      | <b>19</b>            |
| MoS <sub>2</sub> /NaYF <sub>4</sub>                                      | -15            | 980               | 0.1                | $10^8$                                  | 8ms/14ms                                         | <b>20</b>            |
| (NaYF <sub>4</sub> :Yb/Er@Na<br>YF <sub>4</sub> :Nd/Yb)/MoS <sub>2</sub> | 1              | 980               | 10.5               |                                         | 7.9s/2.9s                                        | <b>21</b>            |
| <b>MoS<sub>2</sub>:Er/SiO<sub>2</sub>/p-Si</b>                           | <b>-0.5</b>    | <b>980</b>        | <b>46.7</b>        | <b><math>3.67 \times 10^{10}</math></b> | <b>1.4<math>\mu</math>s/152<math>\mu</math>s</b> | <b>This<br/>work</b> |

## References

- 1 M. Kim, J. Seo, J. Kim, J. S. Moon, J. Lee, J. Kim, J. Kang, H. Park, *ACS Nano*, 2021, **15**, 3038-3046.
- 2 U. Holzwarth and N. Gibson, *Nat. Nanotechnol.*, 2011, **6**, 534.
- 3 J. Kim, Y. Song, T. Kim, K. Cho, J. Pak, B. Y. Choi, J. Shin, S. Chung and T. Lee, *Nanotechnology*, 2017, **28**, 41L-47L.
- 4 M. Desseigne, N. Dirany, V. Chevallier and M. Arab, *Appl. Surf. Sci.*, 2019, **483**, 313-323.
- 5 M. Lun, W. Wu, Z. Xing, H. Song, Y. Wang, W. Li, B. Chu and Q. He, *J. Lumin.*, 2020, **223**, 117189.
- 6 A. J. Jebathew, M. Karunakaran, K. D. A. Kumar, S. Valanarasu, V. Ganesh, M. Shkir, S. Alfaify and A. Kathalingam, *Physica B: Condensed Matter*, 2019, **572**, 109-116.
- 7 J. Guo, S. Li, Y. Ke, Z. Lei, Y. Liu, L. Mao, T. Gong, T. Cheng, W. Huang and X. Zhang, *Scripta Mater.*, 2020, **176**, 1-6.
- 8 S. Pak, Y. Cho, J. Hong, J. Lee, S. Lee, B. Hou, G. An, Y. Lee, J. E. Jang, H. Im, S. M. Morris, J. I. Sohn, S. Cha and J. M. Kim, *ACS Appl. Mater. Inter.*, 2018, **10**, 38264-38271.
- 9 J. Choi, H. Y. Jang, A. R. Kim, J. Kwon, B. Cho, M. H. Park and Y. Kim, *Nanoscale*, 2021, **13**, 672.
- 10 Y. Li, J. G. Distefano, A. A. Murthy, J. D. Cain, E. D. Hanson, Q. Li, F. C. Castro, X. Chen and V. P. Dravid, *ACS Nano*, 2017, **11**, 10321-10329.
- 11 J. Deng, Z. Guo, Y. Zhang, X. Cao, S. Zhang, Y. Sheng, H. Xu, W. Bao and J. Wan, *IEEE Electr. Device L.*, 2019, **40**, 423-426.
- 12 S. Qin, H. Xu, M. Liu, N. Ali, Y. Chen, S. Zhao and H. Wu, *Appl. Surf. Sci.*, 2022, **585**, 152594.
- 13 A. Pezeshki, S. H. H. Shokouh, T. Nazari, K. Oh and S. Im, *Adv. Mater.*, 2016, **28**, 3216-3222.
- 14 J. Yao, F. Chen, J. Li, J. Du, D. Wu, Y. Tian, C. Zhang, J. Yang, X. Li and P. Lin, *J. Mater. Chem. C*, 2021, **9**, 13123-13131.
- 15 M. Peng, Y. Tao, X. Hong, Y. Liu, Z. Wen and X. Sun, *J. Mater. Chem. C*, 2022, **10**, 2236-2244.
- 16 H. Y. Jang, J. H. Nam, J. Yoon, Y. Kim, W. Park and B. Cho, *Nanotechnology*, 2020, **31**, 225205.
- 17 J. Qu and J. Chen, *Micro and Nanostructures*, 2022, **166**, 207231.
- 18 L. Guo, Y. Gu, Z. Yang, S. Tian, X. San, J. Liu, L. Gao, S. Qiao and S. Wang, *Adv. Mater. Interfaces*, 2021, **8**, 2002231.
- 19 H. Yu, Y. Xie, J. Wei, P. Zhang and Z. Cui, *Adv. Mater. Interfaces*, 2022, **9**, 2200896.
- 20 Y. Zhang, J. Wang, B. Wang, J. Shao, J. Deng, C. Cong, L. Hu, P. Tian, R. Liu, S. Zhang, and Z. Qiu, *Adv. Optical Mater.*, 2018, **6**, 1800660.
- 21 N. Zhou, B. Xu, L. Gan, J. Zhang, J. Han and T. Zhai, *J. Mater. Chem. C*, 2017, **5**, 1591-1595.
